1 *Manuscript for BioRxiv / Cell Biology*

2 **Nanoscale manipulation of membrane curvature for**  
3 **probing endocytosis in live cells**

4 Wenting Zhao<sup>1</sup>, Lindsey Hanson<sup>2, &</sup>, Hsin-Ya Lou<sup>2</sup>, Matthew Akamatsu<sup>3</sup>, Praveen D.  
5 Chowdary<sup>2</sup>, Francesca Santoro<sup>2</sup>, Jessica R. Marks<sup>3</sup>, Alexandre Grassart<sup>3</sup>, David G. Drubin<sup>3, \*</sup>,  
6 Yi Cui<sup>1, 4, \*</sup>, Bianxiao Cui<sup>2, \*</sup>

7 <sup>1</sup>Department of Materials Science and Engineering, Stanford University, 476 Lomita Mall,  
8 Stanford, CA 94305, USA.

9 <sup>2</sup>Department of Chemistry, Stanford University, 380 Roth Way, Stanford, CA 94305, USA.

10 <sup>3</sup>Department of Molecular & Cell Biology, University of California, Berkeley, 16 Barker Hall,  
11 Berkeley, CA 94720, USA.

12 <sup>4</sup>Stanford Institute for Materials and Energy Sciences, SLAC National Accelerator  
13 Laboratory, 2575 Sand Hill Rd, Menlo Park, CA 94025, USA.

14 \* Corresponding Authors: [bcui@stanford.edu](mailto:bcui@stanford.edu); [yicui@stanford.edu](mailto:yicui@stanford.edu); [drubin@berkeley.edu](mailto:drubin@berkeley.edu).

15 & Current address: Materials Sciences Division, Lawrence Berkeley National Laboratory, 1  
16 Cyclotron Rd, Berkeley, CA 94720

17 **(Keywords: clathrin, dynamin, endocytosis, membrane curvature, curvature sensing,**  
18 **nanopillar, nanowire, nanostructure.)**

19           **Clathrin-mediated endocytosis (CME) involves nanoscale bending and inward**  
20 **budding of the plasma membrane, by which cells regulate both the distribution of**  
21 **membrane proteins and the entry of extracellular species<sup>1,2</sup>. Extensive studies have**  
22 **shown that CME proteins actively modulate the plasma membrane curvature<sup>1,3,4</sup>.**  
23 **However, the reciprocal regulation of how plasma membrane curvature affects the**  
24 **activities of endocytic proteins is much less explored, despite studies suggesting that**  
25 **membrane curvature itself can trigger biochemical reactions<sup>5-8</sup>. This gap in our**  
26 **understanding is largely due to technical challenges in precisely controlling the**  
27 **membrane curvature in live cells. In this work, we use patterned nanostructures to**  
28 **generate well-defined membrane curvatures ranging from +50 nm to -500 nm radius of**  
29 **curvature. We find that the positively curved membranes are CME hotspots, and that**  
30 **key CME proteins, clathrin and dynamin, show a strong preference toward positive**  
31 **membrane curvatures with a radius < 200 nm. Of ten CME related proteins we**  
32 **examined, all show preferences to positively curved membrane. By contrast, other**  
33 **membrane-associated proteins and non-CME endocytic protein, caveolin1, show no**  
34 **such curvature preference. Therefore, nanostructured substrates constitute a novel tool**  
35 **for investigating curvature-dependent processes in live cells.**

36           Membrane curvature is no longer seen merely as a passive feature of membranes, but  
37 has emerged as a highly active player in regulating protein activities<sup>9,10</sup>. To date, how  
38 membrane curvature affects protein binding and activity has been primarily studied using *in*  
39 *vitro* systems, such as supported lipid bilayers and lipid vesicles<sup>8,11,12</sup>. However, these  
40 findings need to be validated in live cells, which in the context of endocytosis requires  
41 controlling plasma membrane curvature at the scale of tens to hundreds of nanometer radius.  
42 This is a challenging task as the plasma membrane is a dynamic and complex system  
43 containing hundreds of different lipid and protein components. A recent study has shown that

44 the plasma membrane can be deformed on nanoscale conical structures (nanocones), which  
45 triggers the recruitment of curvature-sensing N-BAR proteins<sup>13</sup>. However, as nanocones were  
46 variables in sizes and densely packed<sup>14</sup>, the extent of nanocone-induced membrane curvature  
47 was not well controlled and not individually discernible under an optical microscope<sup>13</sup>.  
48 Conversely, we and others have shown that vertically-aligned nanopillars that are evenly  
49 spaced and uniform in size can induce conformal plasma membrane wrapping in mammalian  
50 cells<sup>15-17</sup>. Based on these studies, we hypothesize that the shape and geometry of vertically-  
51 aligned nanostructures can be used to control local membrane curvature in live cells (**Fig. 1a**).  
52 In this work, we demonstrate that vertically-aligned nanostructure arrays generate well-  
53 defined membrane curvature, which we exploit to probe how membrane curvature affects  
54 CME activities.

55 To demonstrate that membrane curvature can be controlled using vertically-aligned  
56 nanopillars, we engineered a gradient array of SiO<sub>2</sub> nanopillars with different radii from 50  
57 nm to 500 nm with a 14 nm increment (scanning electron microscopy (SEM) see **Fig. 1b**).  
58 The size variations are within 10% of the nominal value (**Suppl. Fig. S1, Table S1-4**). The  
59 area along the side of each nanopillar is about 10 times the area of the top, so we primarily  
60 considered the membrane curvature along the side, a positive curvature denoted by the  
61 nanopillar radius. These curvatures cover the mid range of endocytic curvature progression  
62 (from flat to ~50 nm radius). SK-MEL-2 cells cultured on a poly-L-lysine coated substrate  
63 bend their membrane on nanopillars, as seen in the SEM image in **Fig. 1c**. This was  
64 substantiated by the cross-section visualization using TEM (**Fig. 1d**) and focused ion beam  
65 and scanning electron microscopy (FIB-SEM) (**Suppl. Fig. S2**). The plasma membrane  
66 wraps around nanopillars with an average gap distance of 21.6±14.1 nm (mean ± s.d.),  
67 consistent with previous findings<sup>15</sup>. Membrane wrapping around nanopillars of all sizes was  
68 further confirmed by membrane staining (CellMask™ Deep Red, **Fig. 1e**), where rings

69 appeared on large nanopillars and dots appeared on small nanopillars below the diffraction  
70 limit. The fluidity of the membrane around nanopillars was verified to be similar to that of  
71 flat areas using fluorescence recovery after photobleaching (**Suppl. Fig. S3, Movie S1**).  
72 These results confirm that vertically-aligned nanopillars can induce well-defined plasma  
73 membrane curvatures.

74 In TEM (**Fig. 1f**) and FIB-SEM (**Suppl. Fig. 2e**), we captured a few endocytic events  
75 as shown by the characteristic clathrin-coated pit profiles, indicating that CME does occur on  
76 nanopillar-curved membranes. To investigate CME further, we used gradient nanopillar  
77 arrays to examine how membrane curvature affects the distribution of two key CME proteins,  
78 clathrin and dynamin<sup>18,19</sup>. Immunostaining clearly showed increased clathrin and dynamin  
79 signals at nanopillars (arrows, **Fig. 1g**). To account for cell-to-cell variations, we averaged  
80 signals from over 2000 nanopillars in 41 cells to obtain averaged fluorescence images of  
81 clathrin and dynamin at each nanopillar radius (**Fig. 1h**). As a control for the surface area, we  
82 also measured the fluorescence signal of a supported lipid membrane (**Fig. 1h**, bottom panel),  
83 a membrane associated protein (GFP-CAAX), and CellMask staining on the same array  
84 (**Suppl. Fig. S4**). The fluorescent signals for the membrane, clathrin and dynamin all  
85 increased with increasing nanopillar radius (**Fig. 1i**, top). By normalizing the intensities of  
86 clathrin and dynamin against that of the membrane (**Fig. 1i**, bottom), we found that the ratios  
87 of clathrin/membrane and dynamin/membrane are relatively constant for radii > 200 nm.  
88 However, for radii < 200 nm, both ratios increase significantly, indicating a clear preference  
89 of clathrin and dynamin for curvature radius < 200 nm. This strong preference for high  
90 curvature is also evident in single cells. In an averaged image from a 4-min movie (**Fig. 1j**  
91 shows), dynamin2-GFP exhibits stronger signals at small-radius nanopillars than at large-  
92 radius nanopillars in the same cell (Arrow 3 vs. Arrow 1 in **Fig. 1j**), despite their smaller  
93 membrane area.

94           The preferential accumulation of proteins on highly curved membranes is more  
95 compellingly demonstrated by nanostructures that generate a local combination of different  
96 curvatures. As illustrated in **Fig. 2a**, a single nanobar structure locally induces two different  
97 membrane curvatures – high curvature at the two ends and zero curvature in the middle. **Fig.**  
98 **2b** shows an SEM image of a nanobar array. When cells were cultured on the nanobar array,  
99 the plasma membrane was found to wrap evenly around the bars, outlining the nanobar shape  
100 as shown by CellMask staining (**Fig. 2c**). To probe protein dynamics, genome-edited SK-  
101 MEL-2 cells ( $hCLTA^{EN}/hDNM2^{EN}$ )<sup>19</sup> that express clathrin-RFP and dynamin2-GFP were  
102 cultured on nanobar arrays. Unlike the CellMask staining, both clathrin and dynamin2  
103 showed strong preferences for the highly curved ends of the nanobars and very little  
104 accumulation with the middle region (**Fig. 2d**). The averaged images from over 167 nanobars  
105 (**Fig. 2e**) more clearly illustrated the strong accumulation of clathrin and dynamin at nanobar  
106 ends (**Fig. 2f**). Kymograph analysis of time-lapse movies demonstrated that both clathrin and  
107 dynamin2 were dynamic and had strong preference for nanobar ends (**Fig. 2g, Suppl. Fig. S5,**  
108 **Movie S2**). Endocytic events, as evidenced by the characteristic appearance of dynamin2  
109 near the end of the clathrin lifetime<sup>19</sup>, are abundant at nanobar ends, while very few events  
110 are observed in the middle of the same nanobars. Similarly, the endocytic adaptor protein  
111 AP2 (AP2-RFP) also shows preferred accumulation on nanopillars with the appearance of  
112 dynamin2-GFP at the end of the AP2 lifetime (**Suppl. Fig. S6, Movie S3**).

113           In addition to probing membrane curvatures of different magnitudes, we also probed  
114 curvatures of opposite signs. We engineered nanoC and nanoU to induce positive curvature at  
115 the outer face (**Fig. 2a**, red line) and negative curvature at the inner face (**Fig. 2a**, green line).  
116 In order to distinguish the outer and inner faces by optical microscopy, we made nanoC and  
117 nanoU structures of 500 nm width (**Fig. 2h**). Membrane staining by CellMask clearly  
118 illustrates the inner and the outer faces and confirms that nanoC and nanoU induced both

119 positive and negative membrane curvatures (**Fig. 2i**). When hCLTA<sup>EN</sup>/hDNM2<sup>EN</sup> cells were  
120 cultured on nanoC and nanoU, both clathrin and dynamin2 exhibited accumulation on the  
121 outer surface of the nanostructures with positive membrane curvature. By contrast, very little  
122 protein signal appeared on the negative curvature side (**Fig. 2j**). The averaged images from  
123 over 50 nanoCUI structures show that both clathrin and dynamin prefer high curvature  
124 locations at the ends of nanoC, nanoU and nanoI (**Fig. 2k**). For nanoC and nanoU, the  
125 fluorescence intensities at the outer surface are statistically higher than on the inner surface  
126 (**Fig. 2l**). These results demonstrate that endocytosis, a process of positive curvature  
127 progression, is favored by preformed positive, but not negative, curvature.

128 Besides clathrin and dynamin2, many other proteins and lipids participate in CME<sup>20</sup>  
129 (schematic see **Fig. 3a**). We examined the curvature preference of twelve proteins on nanobar  
130 arrays, including those with curvature-sensing domains (e.g., epsin with an ENTH domain<sup>21</sup>  
131 and amphiphysin with an N-BAR domain<sup>22</sup>) and those not reported to have curvature-sensing  
132 domains (e.g., AP2<sup>23</sup>). The high magnification fluorescence images in **Fig. 3 b-o** (green color  
133 images) show the spatial distributions of different proteins on six nanobars (the  
134 corresponding full images are shown in **Suppl. Fig. S7-S8**). For each protein, the averaged  
135 image over hundreds of nanobars is shown in grey-scale and the protein intensity is plotted  
136 along the length of the nanobar (**Fig. 3 b-o**). Their curvature preference was evaluated by the  
137 ratio of the intensity at the nanobar-end vs. nanobar-center (**Fig. 3p, Suppl. Table S6**).

138 As a reference for protein distribution, the plasma membrane was probed by  
139 CellMask (**Fig. 3b**) and a plasma membrane-associated protein mCherry-CAAX (**Fig. 3c**),  
140 both were homogeneous along the length of the nanobar. In sharp contrast, all 10 CME  
141 proteins showed spatial preference for the highly curved ends of nanobars (**Fig. 3. d-m**).  
142 Proteins involved in the early stages of CME such as FCHO-1-GFP<sup>24</sup> (**Fig. 3d**) and transferrin  
143 receptor (TfnR-GFP)<sup>25</sup> (**Fig. 3e**) showed moderate preference to nanobar ends. Proteins

144 involved in the later stages of CME showed much stronger preference, including epsin1-GFP  
145 (**Fig. 3f**), amphiphysin1-YFP (**Fig. 3g**), CLTA-RFP (**Fig. 3h**), DNM2-GFP (**Fig. 3i**), AP2-  
146 GFP (**Fig. 3j**), intersectin (**Fig. 3k**), cortactin (**Fig. 3l**), and actin (**Fig. 3m**). Their averaged  
147 images show a characteristic dumbbell shape and the intensity plots indicate two pronounced  
148 peaks at the two ends of the nanobars (**Fig. 3f-m**). Of all the CME proteins, AP2, intersectin,  
149 cortactin and actin are not reported to have curvature sensitive-domains. Their accumulation  
150 at nanobar ends strongly indicates that both curvature sensitive and non-sensitive CME  
151 proteins co-assemble at highly curved membrane for CME progression.

152         Although CME proteins show strong preference to highly curved membrane, a  
153 signaling lipid involved in the CME process, phospholipid phosphatidylinositol 4,5-  
154 biphosphate (PIP2)<sup>26,27</sup>, did not show such preference. PIP2 was probed using the PH domain  
155 of PLC-delta (PH-GFP) (**Fig. 3n**), which showed uniform distribution along the nanobar  
156 similar to CellMask. We also examined the curvature sensing of caveolin1, an essential  
157 protein in caveolin-dependent endocytosis<sup>28</sup>. As shown in **Fig. 3o**, caveolin1 formed puncta  
158 evenly distributed along the entire length of nanobars with no preference toward the nanobar  
159 ends. This indicates that caveolin-dependent and clathrin-mediated endocytosis are affected  
160 differently by membrane curvature.

161         In addition to probing the spatial preference of CME proteins for membrane  
162 curvatures, we also investigated their dynamics. We compared the occurrence frequency of  
163 dynamin2 spots on nanopillars of 150 nm radius *vs.* on flat areas. Line kymographs crossing  
164 several nanopillars showed clear segments of dynamin2 traces aligned with nanopillars (**Fig.**  
165 **4a**, blue lines), while very few dynamin2 events on adjacent flat areas (**Fig. 4a**, red lines).  
166 The rapid appearance and disappearance of a dynamin2 spot is a signature of an endocytic  
167 vesicle scission event<sup>19</sup>. A spatial map of dynamin2 events clearly shows hotspots for  
168 endocytosis at nanopillars (**Fig. 4b**). After normalizing for the membrane area, there is

169 significantly more occurrence of dynamin2 clusters on nanopillars than on flat membranes  
170 (**Fig. 4b**), indicating that pre-curved membranes are preferred CME sites.

171 Besides frequency, we also measured the lifetime of dynamin2 and clathrin spots on  
172 nanopillars *vs.* on flat areas (**Suppl. Movie S4**). The dynamin2 lifetime distribution (**Fig. 4c**)  
173 shows two apparent populations on flat areas, one around 20 s and the other around 35 s. On  
174 nanopillars, the dynamin2 lifetime distribution also shows similar peaks, but the population  
175 with longer lifetimes is slightly decreased. The average lifetime of dynamin2 is slightly  
176 shorter on nanopillars ( $24 \pm 0.6$  s *vs.*  $28 \pm 0.7$  s, mean $\pm$ SEM) (**Fig. 4d**). On the other hand, the  
177 lifetime for clathrin spots appears to decrease significantly on nanopillars as compared to flat  
178 areas ( $45 \pm 2.3$  s *vs.*  $65 \pm 4.3$  s, mean $\pm$ SEM). It is plausible that pre-curved membrane reduces  
179 the energy barrier for the membrane bending and thus facilitates faster clathrin coat assembly.  
180 However, we note that the lifetime measurement may miss some long clathrin events as  
181 multiple endocytosis events sometimes overlap on nanopillars.

182 Our results demonstrate that CME proteins show spatial preference to highly  
183 positively curved over flat or negatively curved membranes in live cells. We also confirm  
184 that membrane curvature can directly modulate the biochemical activities of CME, as  
185 previously proposed<sup>5</sup>. Interestingly, actin also shows a strong preference for highly curved  
186 membranes. As actin and its regulators are involved in diverse cellular functions<sup>29,30</sup>, these  
187 results suggest that membrane curvature may affect many other cellular processes in addition  
188 to endocytosis. The ability to precisely manipulate membrane curvature in live cells opens up  
189 new avenues to study the influence of membrane curvature on a variety of cellular processes.



## 190 **Methods**

191 Methods and associated references are described in the supplementary information.

## 192 **Author Contribution**

193 W.Z., B.C., Y.C., and D.G.D conceived the study and designed the experiment. W.Z.  
194 fabricated the nanostructure substrates, and performed most of experiments. L.H. performed  
195 TEM measurements. F.S. conducted the FIB/SEM characterization. H.Y.L. performed most  
196 of the endocytic protein test on nanobar arrays and the quantification and statistic analysis.  
197 W.Z., P.C. and B.C. developed the Matlab code for the dynamic analysis. W.Z. analyzed the  
198 most of the data. M.A. analyzed the AP2/Dynamin2 movies. A.G., and J.M provided and  
199 characterized the genome-edited cell line. W.Z. and B.C. wrote the manuscript. All the  
200 authors discussed the results and commented on the manuscript.

## 201 **Acknowledgement**

202 We thank Dr. Yansong Miao and Dr. Sun Hae Hong of the Drubin group in U.C. Berkeley  
203 for valuable discussion as well as helpful comments on genome-edited cell lines and  
204 endocytic lifetime analysis, Prof. Kang Shen in Stanford for generous support on spinning  
205 disk confocal microscopy, Dr. Milos Galic of the Tobias Meyer group in Stanford for  
206 suggestions and Amphiphysin1-YFP plasmid, Dr. Shunling Guo of the Bianxiao Cui group  
207 for constructing mCherry-CAAX plasmid, as well as Allister McGuire, Dr. Chong Xie and  
208 Dr. Ziliang Lin of the Bianxiao Cui group in Stanford for advice and help on the  
209 nanostructure fabrication. We also thank Qunxiang Ong and Luke Kaplan of Bianxiao Cui  
210 group for comments on the manuscript. Fabrication and characterization of nanostructures  
211 were conducted in Stanford Nanofabrication Center and Stanford Nano Shared Facilities  
212 (SNSF). Spinning disk confocal with perfect focus for lifetime measurement was conducted  
213 in Cell Science Imaging Facility (CSIF) at Stanford University. This work was supported by  
214 the NSF (CAREER award no. 1055112), the NIH (grant no. NS057906), a Searle Scholar  
215 award, a Packard Science and Engineering Fellowship (to B.C.), NIH fellowship 1F32  
216 GM113379 (to J.R.M.) and the NIH (R01 GM65462) (to D.G.D.).

## 217 **References**

- 218 1. McMahon, H. T. & Boucrot, E. Molecular mechanism and physiological functions of clathrin-  
219 mediated endocytosis. *Nat Rev Mol Cell Biol* **12**, 517–533 (2011).
- 220 2. Di Fiore, P. P. & Zastrow, von, M. Endocytosis, signaling, and beyond. *Cold Spring Harb.*  
221 *Perspect. Biol.* **6**, (2014).
- 222 3. Johannes, L., Wunder, C. & Bassereau, P. Bending ‘on the rocks’--a cocktail of biophysical  
223 modules to build endocytic pathways. *Cold Spring Harb. Perspect. Biol.* **6**, a016741–a016741  
224 (2014).
- 225 4. Kirchhausen, T., Owen, D. & Harrison, S. C. Molecular Structure, Function, and Dynamics of  
226 Clathrin-Mediated Membrane Traffic. *Cold Spring Harb. Perspect. Biol.* **6**, a016725–a016725  
227 (2014).
- 228 5. McMahon, H. T. & Gallop, J. L. Membrane curvature and mechanisms of dynamic cell  
229 membrane remodelling. *Nature* **438**, 590–596 (2005).
- 230 6. Liu, J., Sun, Y., Drubin, D. G. & Oster, G. F. The mechanochemistry of endocytosis. *PLoS*  
231 *Biol* **7**, e1000204 (2009).
- 232 7. Galic, M. *et al.* Dynamic recruitment of the curvature-sensitive protein ArhGAP44 to  
233 nanoscale membrane deformations limits exploratory filopodia initiation in neurons. *eLife* **3**,  
234 e03116 (2014).

- 235 8. Larsen, J. B. *et al.* Membrane curvature enables N-Ras lipid anchor sorting to liquid-ordered  
236 membrane phases. *Nat Chem Biol* **11**, 192–194 (2015).
- 237 9. Epand, R. M., D'Souza, K., Berno, B. & Schlame, M. Membrane curvature modulation of  
238 protein activity determined by NMR. *Biochim. Biophys. Acta* **1848**, 220–228 (2015).
- 239 10. Iversen, L., Mathiasen, S., Larsen, J. B. & Stamou, D. Membrane curvature bends the laws of  
240 physics and chemistry. *Nat. Cell Bio.* **11**, 822–825 (2015).
- 241 11. Wu, M. *et al.* Coupling between clathrin-dependent endocytic budding and F-BAR-dependent  
242 tubulation in a cell-free system. *Nat. Cell Bio.* **12**, 902–908 (2010).
- 243 12. Lee, I.-H., Kai, H., Carlson, L.-A., Groves, J. T. & Hurley, J. H. Negative membrane curvature  
244 catalyzes nucleation of endosomal sorting complex required for transport (ESCRT)-III  
245 assembly. *Proc. Natl. Acad. Sci. U.S.A.* **112**, 15892–15897 (2015).
- 246 13. Galic, M. *et al.* External push and internal pull forces recruit curvature-sensing N-BAR  
247 domain proteins to the plasma membrane. *Nat. Cell Bio.* **14**, 874–881 (2012).
- 248 14. Jeong, S., McDowell, M. T. & Cui, Y. Low-Temperature Self-Catalytic Growth of Tin Oxide  
249 Nanocones over Large Areas. *ACS Nano* **5**, 5800–5807 (2011).
- 250 15. Hanson, L., Lin, Z. C., Xie, C., Cui, Y. & Cui, B. Characterization of the cell-nanopillar  
251 interface by transmission electron microscopy. *Nano Lett.* **12**, 5815–5820 (2012).
- 252 16. Mumm, F., Beckwith, K. M., Bonde, S., Martinez, K. L. & Sikorski, P. A transparent  
253 nanowire-based cell impalement device suitable for detailed cell-nanowire interaction studies.  
254 *Small* **9**, 263–272 (2013).
- 255 17. Santoro, F. *et al.* Interfacing electrogenic cells with 3D nanoelectrodes: position, shape, and  
256 size matter. *ACS Nano* **8**, 6713–6723 (2014).
- 257 18. Avinoam, O., Schorb, M., Beese, C. J., Briggs, J. A. G. & Kaksonen, M. Endocytic sites  
258 mature by continuous bending and remodeling of the clathrin coat. *Science* **348**, 1369–1372  
259 (2015).
- 260 19. Doyon, J. B. *et al.* Rapid and efficient clathrin-mediated endocytosis revealed in genome-  
261 edited mammalian cells. *Nat. Cell Bio.* **13**, 331–337 (2011).
- 262 20. Taylor, M. J., Perrais, D. & Merrifield, C. J. A High Precision Survey of the Molecular  
263 Dynamics of Mammalian Clathrin-Mediated Endocytosis. *PLoS Biol* **9**, e1000604 (2011).
- 264 21. Ford, M. G. J. *et al.* Curvature of clathrin-coated pits driven by epsin. *Nature* **419**, 361–366  
265 (2002).
- 266 22. Peter, B. J. BAR Domains as Sensors of Membrane Curvature: The Amphiphysin BAR  
267 Structure. *Science* **303**, 495–499 (2004).
- 268 23. AP2 controls clathrin polymerization with a membrane-activated switch. **345**, 459–463 (2014).
- 269 24. Henne, W. M. *et al.* FCHo Proteins Are Nucleators of Clathrin-Mediated Endocytosis. *Science*  
270 **328**, 1281–1284 (2010).
- 271 25. Dautry-Varsat, A., Ciechanover, A. & Lodish, H. F. pH and the recycling of transferrin during  
272 receptor-mediated endocytosis. *Proc. Natl. Acad. Sci. U.S.A.* **80**, 2258–2262 (1983).
- 273 26. Di Paolo, G. & De Camilli, P. Phosphoinositides in cell regulation and membrane dynamics.  
274 *Nature* **443**, 651–657 (2006).
- 275 27. Posor, Y. *et al.* Spatiotemporal control of endocytosis by phosphatidylinositol-3,4-  
276 bisphosphate. *Nature* **499**, 233–237 (2013).
- 277 28. Chaudhary, N. *et al.* Endocytic Crosstalk: Cavins, Caveolins, and Caveolae Regulate Clathrin-  
278 Independent Endocytosis. *PLoS Biol* **12**, e1001832 (2014).
- 279 29. Grassart, A. *et al.* Actin and dynamin2 dynamics and interplay during clathrin-mediated  
280 endocytosis. *J. Cell Biol.* **205**, 721–735 (2014).
- 281 30. Dominguez, R. & Holmes, K. C. Actin Structure and Function. *Annu. Rev. Biophys.* **40**, 169–  
282 186 (2011).
- 283

284 **Figures and Captions**

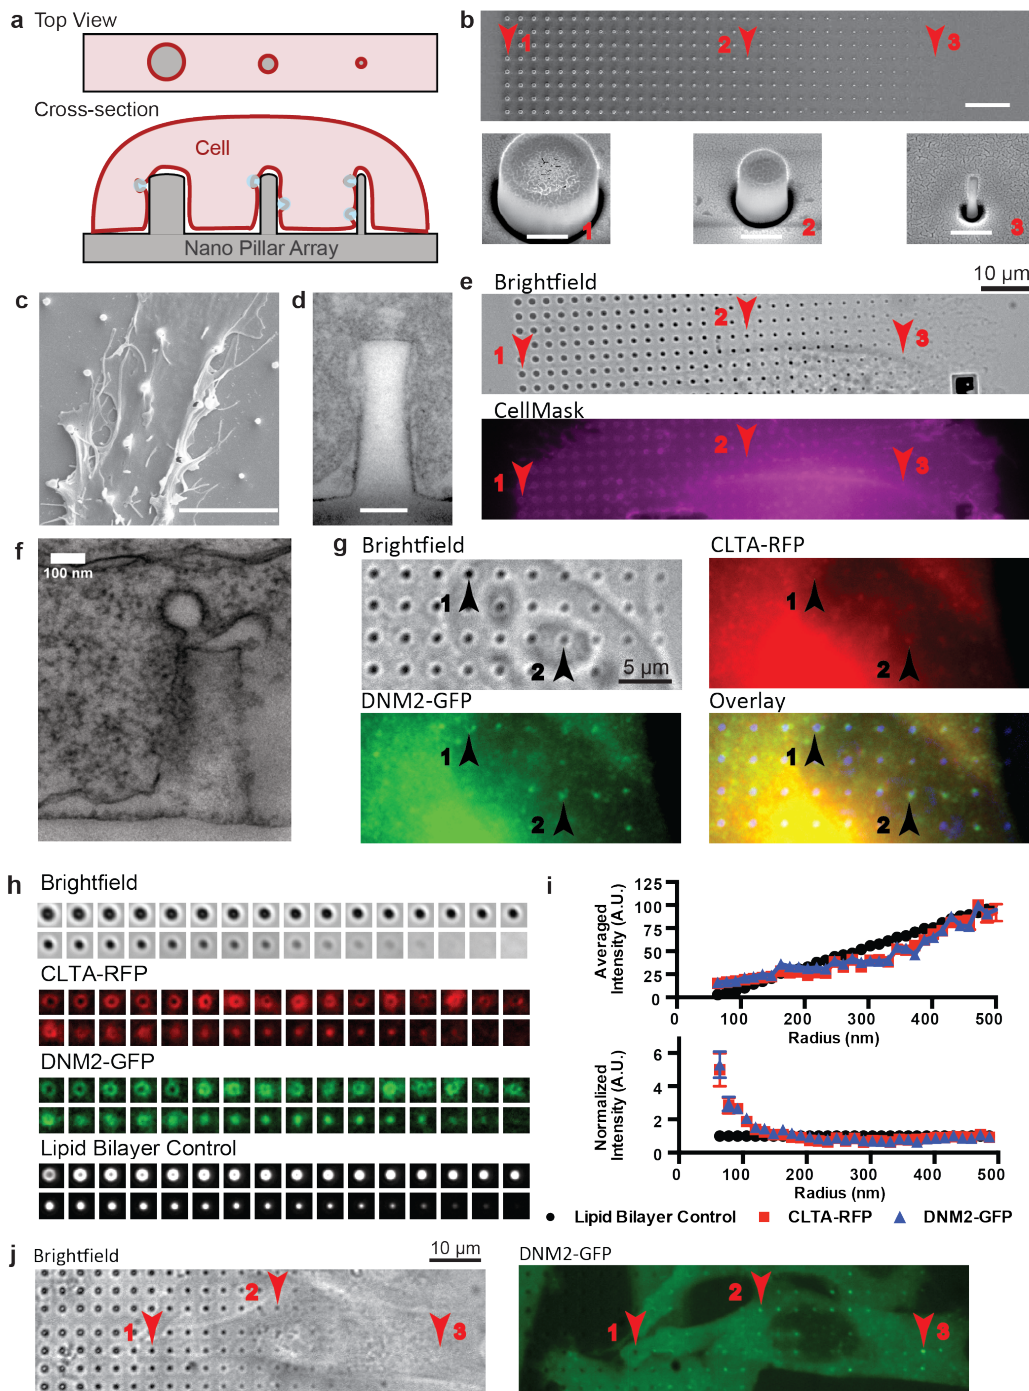

285

286 **Figure 1. Vertical nanopillars generate well-defined membrane curvatures that induce local**  
 287 **accumulation of endocytic proteins. a.** Schematic illustration of nanopillars with different radii  
 288 (grey block) deforming the cell membrane to generate different membrane curvatures (red line). **b.** An  
 289 SEM image of a gradient nanopillar array with 700 nm height, 3  $\mu\text{m}$  center-to-center distance between  
 290 nanopillars, and radii ranging from 500 nm (left) to 50 nm (right) with 14 nm increment. Scale bar: 10  
 291  $\mu\text{m}$ . Bottom row: zoomed-in SEM images of individual nanopillars as indicated by corresponding  
 292 locations in the top row (red with arrow). Scale bar: 400 nm. **c.** An SEM image showing a SK-MEL-2  
 293 cell deforming on nanopillars. Scale bar: 5  $\mu\text{m}$ . **d.** A TEM image showing the cell membrane

294 wrapping around a nanopillar. Scale bar: 100 nm. **e.** The plasma membrane stained with CellMask™  
295 DeepRed shows increased membrane signal at nanopillar locations. Red arrows indicate locations of  
296 nanopillars with different radius. Scale bar: 10 μm. **f.** A TEM image of the plasma membrane  
297 wrapping around a nanopillar captures a clathrin-coated pit. Scale bar: 100 nm. **g.** Immunostaining of  
298 clathrin and dynamin2 in hCLTA<sup>EN</sup>/hDNM2<sup>EN</sup> cells shows accumulation of clathrin and dynamin2 at  
299 nanopillar locations. In the overlay image, the inverted brightfield image is converted to blue (bottom  
300 right). Scale bar: 10 μm. Numbered black arrows indicate locations of nanopillars with different radii.  
301 **h.** Quantification of the clathrin, dynamin2 and membrane signals at nanopillars of 32 different radii.  
302 Signals from many nanopillars of the same radius are averaged to obtain the averaged image.  
303 Averaged images were sorted from largest (top left) to smallest radius (bottom right). Four imaging  
304 channels are shown from top to bottom: bright field, clathrin, dynamin2 and lipid bilayer control for  
305 surface area increment. **i.** Intensities of clathrin-RFP, dynamin2-GFP and lipid membrane all increase  
306 with nanopillar radius (top graph). After normalizing against the membrane intensities, it is clear that  
307 the clathrin/membrane and dynamin2/membrane ratios increase significantly when the nanopillar  
308 radius is less than 200 nm (bottom graph). Each data point is an average over 90-191 nanopillars with  
309 error bar representing standard error of the mean. Detailed statistic analysis is in **Suppl. Table S5.** **j.**  
310 The time-averaged image of a 4 min movie of dynamin2-GFP demonstrates that dynamin2-GFP  
311 exhibits strong preference to sharp nanopillars, but much less to large radius nanopillars in the same  
312 cell (Arrow 1 vs. Arrow 3). Scale bar: 10 μm.

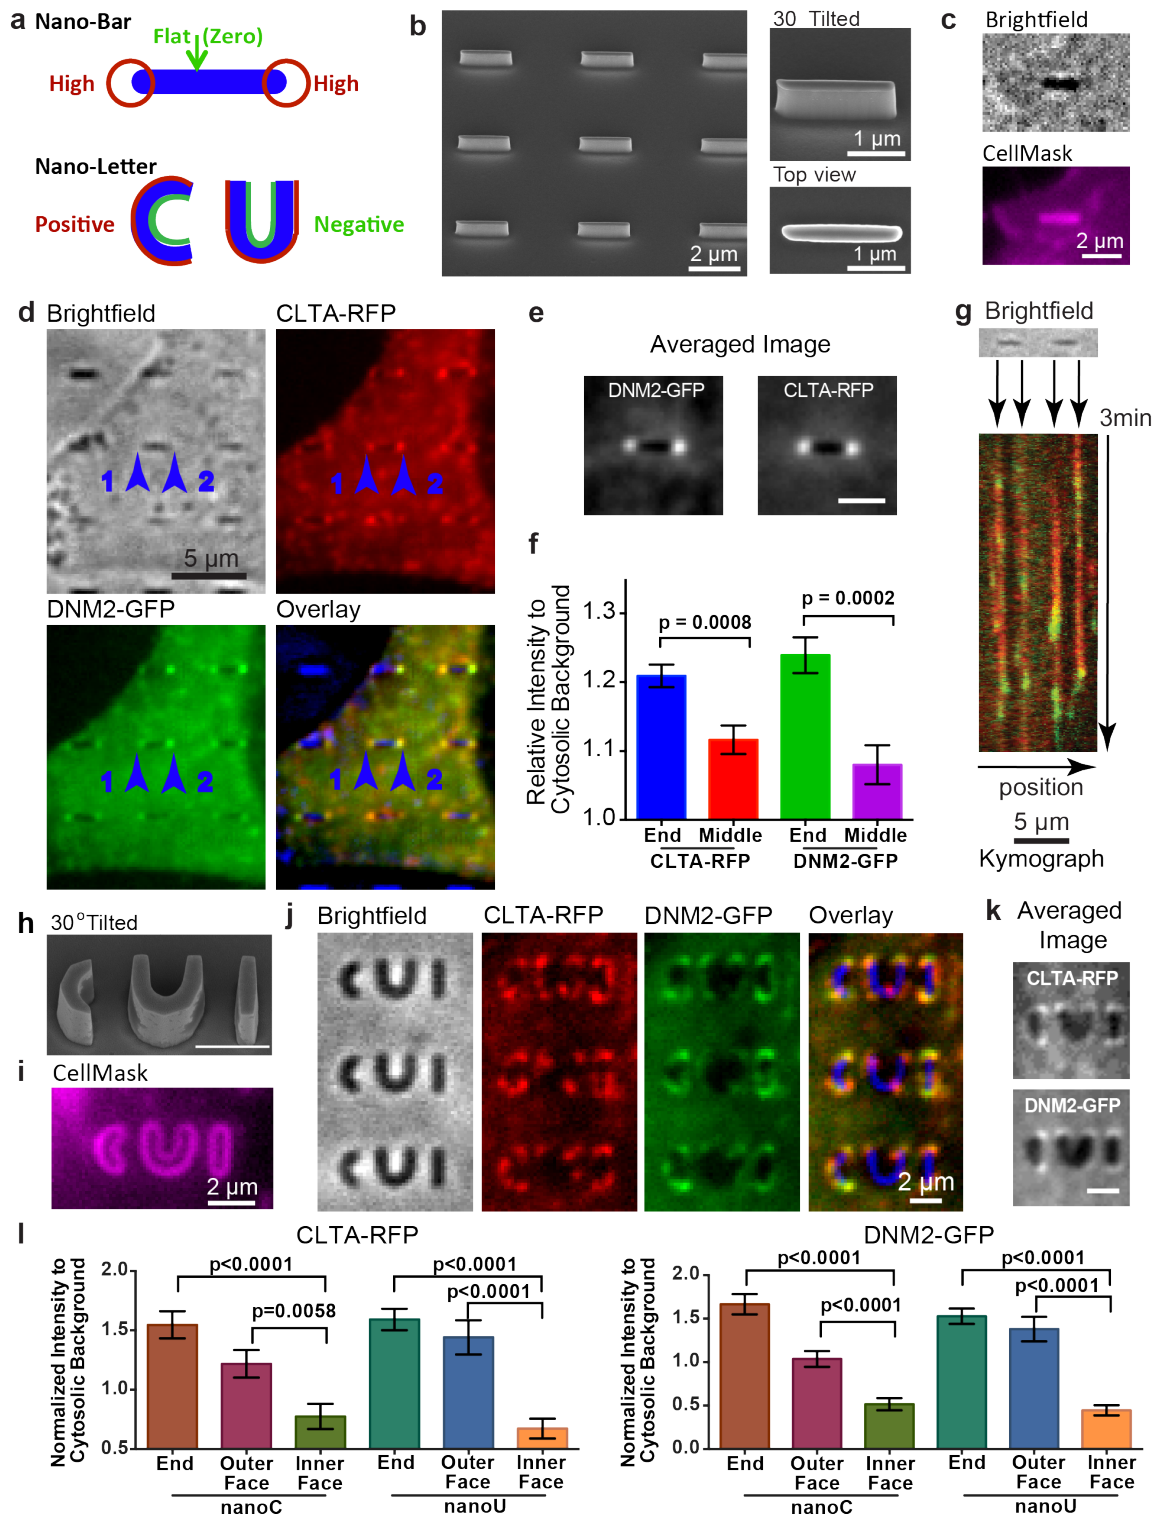

313

314 **Figure 2. Engineered 3D nanostructures for versatile control of membrane curvatures and**  
 315 **endocytic protein accumulations.** **a.** Schematic illustration of nanobar and nano-letter design for  
 316 inducing a range from flat membranes to high membrane curvatures (top, nanobar) and combined  
 317 positive and negative membrane curvatures (bottom, nanoC and nanoU) by the same nanostructure. **b.**  
 318 An SEM image of a nanobar array showing individual nanobars of 150 nm width, 2  $\mu\text{m}$  length, 1  $\mu\text{m}$   
 319 height and 5  $\mu\text{m}$  pitch (left, scale bar: 2  $\mu\text{m}$ ). **c.** When SK-MEL-2 cells were cultured on nanobar  
 320 arrays, CellMask™ DeepRed staining demonstrated that the plasma membrane wrapped evenly

321 around the nanobar. Scale bar: 2  $\mu\text{m}$ . **d.** Averaged fluorescence images of a 4 min movie shows that  
322 clathrin and dynamin2 prefer the two highly curved ends of nanobars as compared with the sidewalls.  
323 This is in sharp contrast to the membrane staining shown in c. In the overlay image, bright field  
324 images of nanobars are shown in blue. Scale bar: 5  $\mu\text{m}$ . **e.** Averaged image of clathrin and dynamin2  
325 distribution on 167 nanobars. Scale bar: 2  $\mu\text{m}$ . **f.** The quantitative values of fluorescence intensity at  
326 nanobar ends and nanobar center with the cytosolic background as reference. Error bar represents  
327 standard error of the mean. Statistic analysis shows significant difference between nanobar end and  
328 nanobar center (p value of unpaired t-test: 0.0008 for Clathrin-RFP and 0.0002 for Dynamin2-GFP). **g.**  
329 Kymograph plots of clathrin-RFP (red) and dynamin2-GFP (green) on two adjacent nanobars show  
330 the appearance of a dynamin2 peak near the end of the clathrin segment, which is characteristic of  
331 clathrin-mediated endocytosis. The dynamic events are observed at the ends of nanobars, with very  
332 little signal along the side walls or between nanobars. More kymographs on a larger area with more  
333 adjacent nanobars are in **Suppl. Fig. S5**. **h.** An SEM image of the nanoCUI structure in 30° tilted  
334 view. Scale bar: 2  $\mu\text{m}$ . **i.** CellMask™ DeepRed staining of cells on nanoCUI array shows that the cell  
335 membrane wrapped around both the inside and the outside surfaces of the nanoC and nanoU  
336 structures. Scale bar: 2  $\mu\text{m}$ . **j.** Averaged fluorescence images of a 4 min movie show that clathrin and  
337 dynamin2 prefer positive membrane curvatures at the ends and the outer surfaces of nanoC and  
338 nanoU, with much less protein signal on the inner surfaces. **k.** Averaged images of clathrin-RFP (top)  
339 and Dynamin2-GFP (bottom) on 51 pairs of nanoC and nanoU clearly show preferred accumulation  
340 on the ends and their outer faces of both nanoC and nanoU comparing to the inner faces. Scale bar: 2  
341  $\mu\text{m}$ . **l.** The quantified fluorescence intensity (in **k**) on the end, the outer face, and the inner face of  
342 both nanoC (left) and nanoU (right) with the cytosolic background as reference. Error bar represents  
343 standard error of the mean. Statistic analysis shows significant difference at the end/the outer face vs.  
344 the inner face of both nanoC and nanoU. The p value of unpaired t-test for each pair is indicated on  
345 the plot.

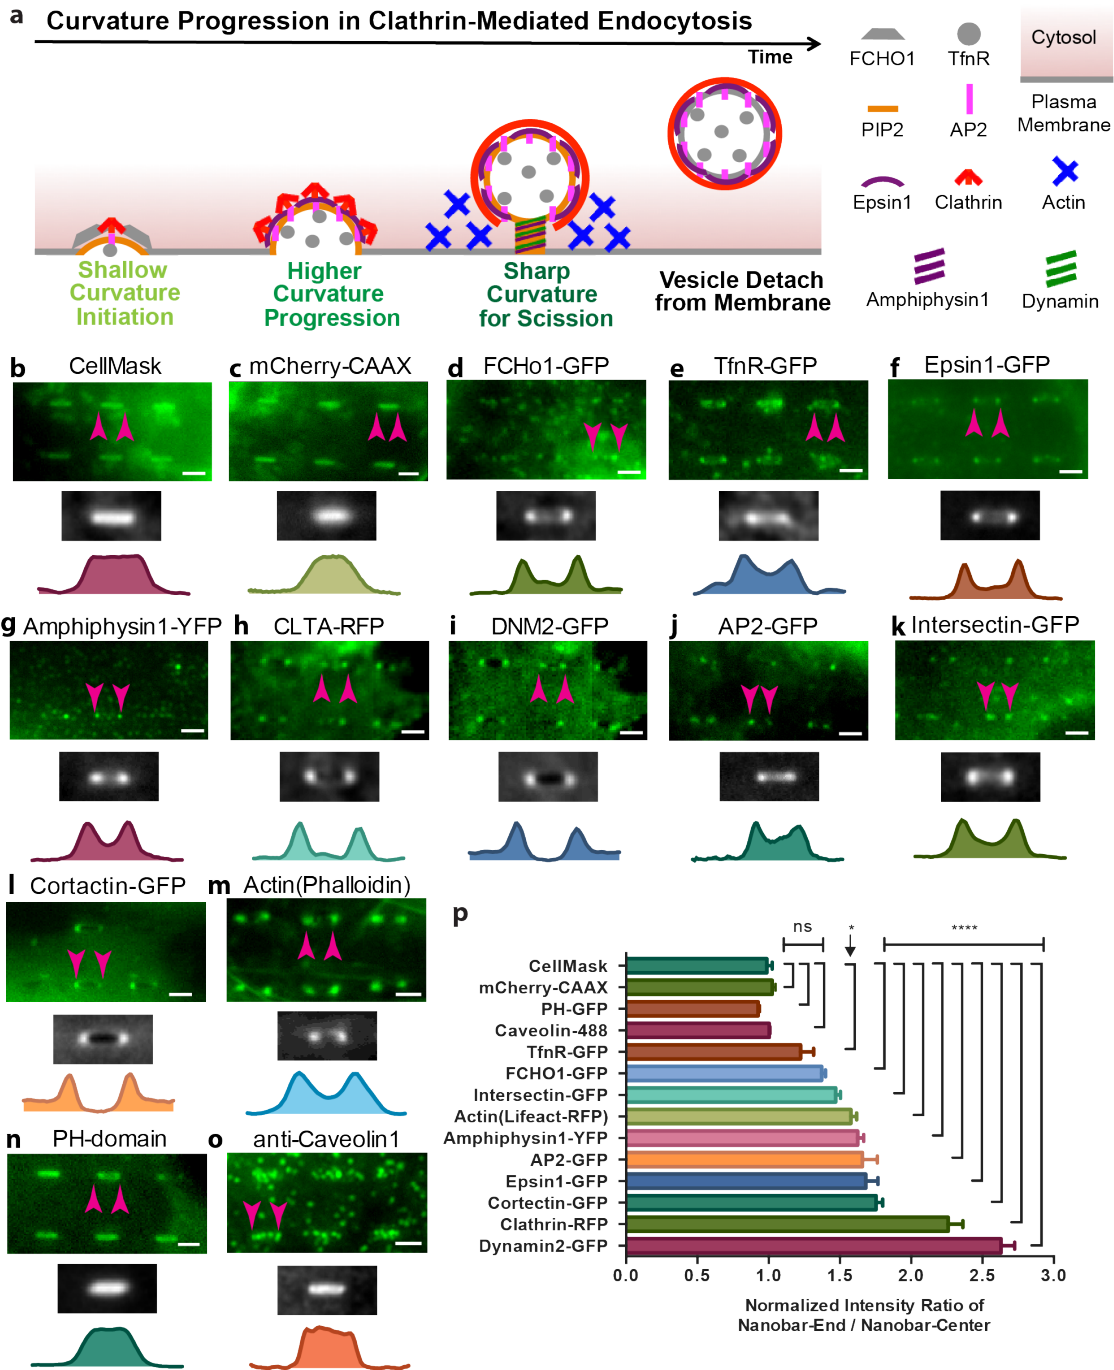

346

347 **Figure 3. Probing curvature sensitivity of various endocytic proteins using nanobar arrays. a.**  
 348 Schematic illustration of proteins involved in different stages of clathrin-mediated endocytosis. The  
 349 high magnification fluorescence images in **b-o** (green color images, scale bar: 2  $\mu$ m) show the  
 350 distributions of different proteins on six nanobars. The corresponding large images can be found in  
 351 the supplementary information (**Fig. S6 and S7**). The averaged image of hundreds of nanobars and  
 352 the intensity along the length of nanobars are shown beneath the fluorescent images. The spatial  
 353 distributions of CellMask™ DeepRed staining the plasma membrane (**b**), and membrane-associated  
 354 protein mCherry-CAAX (**c**) are distributed relatively evenly along the entire length of the nanobars.  
 355 Eight other endocytic components involved in the clathrin-dependent endocytosis including epsin1-  
 356 GFP (**f**), amphiphysin1-YFP (**g**), clathrin-RFP (**h**), dynamin2-GFP (**i**), AP2-GFP (**j**), intersectin (**k**),  
 357 cortactin (**l**) and actin (**m**) show strong bias toward the ends of the nanobars with little accumulation

358 along the sidewalls. In comparison, FCHo1-GFP (**e**), and transferrin receptor (TfnR-GFP) (**f**) show  
359 less preference to the nanobar ends than those above. On the other hand, PIP2 probed by PH-GFP (**n**)  
360 and caveolin1 (**o**), an essential component of the caveolin-dependent endocytosis, is evenly  
361 distributed along the entire length of nanobars. All the nanobars are 2  $\mu\text{m}$  in length. **p**. Distribution of  
362 14 different proteins/dyes on nanobars quantified by normalized intensity ratio of nanobar-end to  
363 nanobar-center. For each protein, the distribution is measured by averaging over 56-2072 nanobars.  
364 Error bar represents standard error of the mean. Statistical significance of each protein vs. CellMask  
365 was evaluated by unpaired t-test with Welch's correction (details see **Suppl. Table S6**). p-value: \*\*\*\*  
366 < 0.0001, \* < 0.05, ns >0.05.



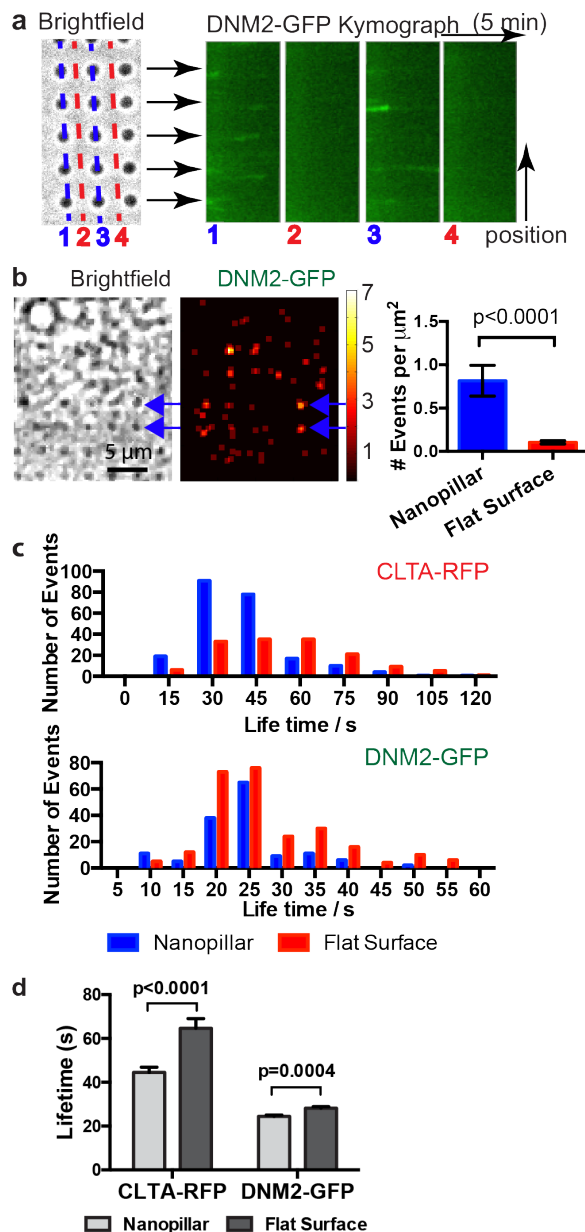

367

368

369

370

371

372

373

374

375

376

377

378

379

380

381

382

**Figure 4. Pre-curved membranes are preferred sites for endocytosis.** **a.** Kymograph plots of dynamin2-GFP along lines of nanopillars show repeated appearance and disappearance of dynamin2 spots at nanopillar locations (line 1 and 3). Similar kymograph plots along lines between nanopillars show very little signal of dynamin2-GFP (line 2 and 4). **b.** Spatial mapping of the occurrence frequency of dynamin2-GFP puncta shows hot spots for endocytosis at nanopillar locations. We measured 65 dynamin2 blinking events on 75 nanopillars in 6 minutes. Nanopillar area is calculated to be  $1 \mu\text{m}^2$  each. From the same set of movies, we measured 62 dynamin2 blinking events on 75 flat areas,  $8 \mu\text{m}^2$  each. After normalizing against the calculated membrane areas, the endocytic event occurrence on curved membrane at nanopillars is significantly higher than that on flat. Error bars represent standard error of the mean and the P value of Kolmogorov–Smirnov test is  $< 0.0001$ . **c.** Lifetime distribution of clathrin-RFP (up) and dynamin2-GFP (bottom) puncta on nanopillars (blue) and on flat areas (red). For clathrin, 226 events were measured on nanopillars and 154 events were measured on flat areas. For dynamin2, 147 events were measured on nanopillars and 260 events were measured on flat areas. For comparison between nanopillar and flat, Kolmogorov–Smirnov test gives p-value of 0.0082 for dynamin2-GFP and  $< 0.0001$  for clathrin-RFP. The differences are significant. **d.**

383 The average lifetimes of clathrin-RFP and dynamin2-GFP appear to be decreased on nanopillars (light  
384 grey) compared with on flat areas (dark grey). Unpaired t-test with equal SD gives p-value of 0.0004  
385 for dynamin2-GFP and <0.0001 for clathrin-RFP. The differences are significant.
